# Supplementary material for: Evidence supporting deployment of next generation insecticide treated nets in Burkina Faso: bioassays with either chlorfenapyr or piperonyl butoxide increase mortality of pyrethroid-resistant Anopheles gambiae
Source: Springer Nature journal article supplement (doi:10.1186/s12936-021-03936-3), 2021-10-18
Supplement: MOESM1 [file 19768524]

## Additional file

**Table SI.** Study sites distributed in three eco-climatical areas with different agricultural practices

| Climatic Area    | Region            | Sentinel Site   | Co-ordinates     | Social environment       | Agricultural practice                                 |
|------------------|-------------------|-----------------|------------------|--------------------------|-------------------------------------------------------|
| Sudanian         | Sud-Ouest         | Kampti          | 10°7'N, 3°27'W   | Sub-urban                | Cereals, cotton                                       |
|                  |                   | Gaoua           | 10°40'N, 3°15'W  | Sub-urban                | Cereals, cotton since 1960s                           |
|                  |                   | Diebouyou       | 10°95'N, 3°24'W  | Sub-urban                | Cereals, cotton since 1960s, USAID IRS site 2010-2012 |
|                  | Cascades          | Mangodara       | 9°54'N, 4°21'W   | Rural                    | Cereals, cotton                                       |
|                  | Hauts-Bassins     | Orodara         | 11°00'N, 4°91'W  | Sub-urban                | Fruit, cotton since 1960s                             |
|                  |                   | Bobo-Dioulasso  | 11°11'N, 4°17'W  | Urban                    | Vegetables, domestic use of insecticides              |
|                  |                   | Soumouso        | 11°01'N, 4°02'W  | Rural                    | Cotton, semi-permanent swamp                          |
| Karangasso-Vigué |                   | 10°52'N, 3°56'W | Rural            | Rice, vegetables, cotton |                                                       |
| Sudano-sahelian  | Boucle du Mouhoun | Solenzo         | 12°11'N, 4°05'W  | Rural                    | Cotton, cereals                                       |
|                  |                   | Nouna           | 12°37'N, 3°55'W  | Sub-urban                | Cotton, cereals                                       |
|                  |                   | Boromo          | 11°75'N, 2°92'W  | Sub-urban                | Cotton, cereals                                       |
|                  | Centre            | Ouagadougou     | 12°22' N, 1°31'W | Urban                    | Vegetables, domestic use of insecticides              |
| Sahelian         | Centre- Nord      | Kongoussi       | 13°19' N, 1°32'W | Sub-urban                | Cereals                                               |
|                  |                   | Seguenega       | 13°15'N, 1°58'W  | Rural                    | Cereals, vegetables (permanent water source)          |
|                  | Sahel             | Kaya            | 13°05'N, 1°05'W  | Sub-urban                | Cereals                                               |
