# Supplementary material for: Evidence supporting deployment of next generation insecticide treated nets in Burkina Faso: bioassays with either chlorfenapyr or piperonyl butoxide increase mortality of pyrethroid-resistant Anopheles gambiae
Source: Malar J. 2021 Oct 18;20:406. doi: 10.1186/s12936-021-03936-3 (PMC8524873; doi:10.1186/s12936-021-03936-3)
Supplement: Supplementary file 4 — Additional file 4. CDC bottle assays using 100ug chlorfenapyr data. [file 12936_2021_3936_MOESM4_ESM.xlsx]

## Sheet: Feuil1
id	TestDate	Populations	ClimaticAera	sites	Insecticides	Dose	Exposure.time(hour)	Type_of_test	Age	#Kd60	%KD60	#Dead24h	#Alive24h	Mortality.rate24h	#Dead48h	#Alive48h	Mortality.rate48h	#Dead72h	#Alive72h	Mortality.rate72h	Total.number
1	2019-09-21	An.gambiae_sl	Sudanian	Kampti	chlorfenapyr	100 ug/bottle	1	Susceptibility	5	6	19.17	99.286	10.714	90,26	107.109	2.89103	97.3718	110	0	100,0	110
2	2019-09-05	An.gambiae_sl	Sudanian	Gaoua	chlorfenapyr	100 ug/bottle	1	Susceptibility	5	10	11.3636	82.896	5.104	94,20	84	4	95.4545	88	0	100,0	88
3	2019-10-04	An.gambiae_sl	Sudanian	Orodara	chlorfenapyr	100 ug/bottle	1	Susceptibility	5	66	76.7442	86	0	100,0	86	0	100	86	0	100,0	86
4	2019-10-18	An.gambiae_sl	Sudanian	Soumousso	chlorfenapyr	100 ug/bottle	1	Susceptibility	5	24	19.8347	121	0	100,0	121	0	100	121	0	100,0	121
5	2019-09-03	An.gambiae_sl	Sudanian	Mangodara	chlorfenapyr	100 ug/bottle	1	Susceptibility	5	58	50.4348	115	0	100,0	115	0	100	115	0	100,0	115
6	2019-10-06	An.gambiae_sl	Sudanian	Karangasso-Vigué	chlorfenapyr	100 ug/bottle	1	Susceptibility	5	23	20	110.871	4.1285	96,41	111.978	3.02244	97.3718	115	0	100,0	115
7	2019-09-24	An.gambiae_sl	Sudan-sahelian	Solenzo	chlorfenapyr	100 ug/bottle	1	Susceptibility	5	7	6.36364	105.116	4.884	95,56	109.083	0.916667	99.1667	110	0	100,0	110
8	2019-10-18	An.gambiae_sl	Sudan-sahelian	Nouna	chlorfenapyr	100 ug/bottle	1	Susceptibility	5	39	33.6207	116	0	100,0	116	0	100	116	0	100,0	116
9	2019-10-19	An.gambiae_sl	Sudan-sahelian	Boromo	chlorfenapyr	100 ug/bottle	1	Susceptibility	5	9	7.08661	98.3488	28.6512	77,44	122.933	4.0669	96.7977	125.976	1.02419	99.1935	127
10	2019-10-31	An.gambiae_sl	Sudan-sahelian	Ouagadougou	chlorfenapyr	100 ug/bottle	1	Susceptibility	5	56	65.1163	86	0	100,0	86	0	100	86	0	100,0	86
11	2019-09-13	An.gambiae_sl	Sahelian	Kongoussi	chlorfenapyr	100 ug/bottle	1	Susceptibility	5	4	4	100	0	100,0	100	0	100	100	0	100,0	100
12	2019-10-04	An.gambiae_sl	Sahelian	Seguenega	chlorfenapyr	100 ug/bottle	1	Susceptibility	5	46	46.4646	99	0	100,0	99	0	100	99	0	100,0	99
13	2019-10-23	An.gambiae_sl	Sahelian	Kaya	chlorfenapyr	100 ug/bottle	1	Susceptibility	5	26	21.1382	121.979	1.0209	99,17	121.975	1.025	99.1667	123	0	100,0	123
13	2019-09-21	An.gambiae_Kisumu		Insectary strains	chlorfenapyr	100 ug/bottle	1	Susceptibility	5	50	100	100	0	100	100	0	100	50	0	100	50
13	2019-09-05	An.gambiae_Kisumu		Insectary strains	chlorfenapyr	100 ug/bottle	1	Susceptibility	5	49	100	100	0	100	100	0	100	49	0	100	49
13	2019-10-04	An.gambiae_Kisumu		Insectary strains	chlorfenapyr	100 ug/bottle	1	Susceptibility	5	50	100	100	0	100	100	0	100	50	0	100	50
13	2019-10-18	An.gambiae_Kisumu		Insectary strains	chlorfenapyr	100 ug/bottle	1	Susceptibility	5	48	100	100	0	100	100	0	100	48	0	100	48
13	2019-09-03	An.gambiae_Kisumu		Insectary strains	chlorfenapyr	100 ug/bottle	1	Susceptibility	5	47	100	100	0	100	100	0	100	47	0	100	47
13	2019-10-06	An.gambiae_Kisumu		Insectary strains	chlorfenapyr	100 ug/bottle	1	Susceptibility	5	50	100	100	0	100	100	0	100	50	0	100	50
13	2019-09-24	An.gambiae_Kisumu		Insectary strains	chlorfenapyr	100 ug/bottle	1	Susceptibility	5	50	100	100	0	100	100	0	100	50	0	100	50
13	2019-10-18	An.gambiae_Kisumu		Insectary strains	chlorfenapyr	100 ug/bottle	1	Susceptibility	5	48	100	100	0	100	100	0	100	48	0	100	48
13	2019-10-19	An.gambiae_Kisumu		Insectary strains	chlorfenapyr	100 ug/bottle	1	Susceptibility	5	49	100	100	0	100	100	0	100	49	0	100	49
13	2019-10-31	An.gambiae_Kisumu		Insectary strains	chlorfenapyr	100 ug/bottle	1	Susceptibility	5	50	100	100	0	100	100	0	100	50	0	100	50
13	2019-09-13	An.gambiae_Kisumu		Insectary strains	chlorfenapyr	100 ug/bottle	1	Susceptibility	5	46	100	100	0	100	100	0	100	46	0	100	46
13	2019-10-04	An.gambiae_Kisumu		Insectary strains	chlorfenapyr	100 ug/bottle	1	Susceptibility	5	50	100	100	0	100	100	0	100	50	0	100	50
13	2019-10-23	An.gambiae_Kisumu		Insectary strains	chlorfenapyr	100 ug/bottle	1	Susceptibility	5	50	100	100	0	100	100	0	100	50	0	100	50
13	2019-10-04	An.gambiae_Kisumu		Insectary strains	chlorfenapyr	100 ug/bottle	1	Susceptibility	5	50	100	100	0	100	100	0	100	50	0	100	50

## Sheet: Feuil2
id	TestDate	Populations	ClimaticAera	sites	Insecticides	Dose	Exposure.time(hour)	Type_of_test	Age	#Kd60	%KD60	#Dead24h	#Alive24h	Mortality.rate24h	#Dead48h	#Alive48h	Mortality.rate48h	#Dead72h	#Alive72h	Mortality.rate72h	Total.number
1	43729	An.gambiae_sl	Sudanian	Kampti	chlorfenapyr	100 ug/bottle	1	Susceptibility	5	6	19.17	99.286	10.714	90.26	107.109	2.89103	97.37	110	0	100.0	110
2	43713	An.gambiae_sl	Sudanian	Gaoua	chlorfenapyr	100 ug/bottle	1	Susceptibility	5	10	11.36	82.896	5.104	94.20	84	4	95.45	88	0	100.0	88
3	43742	An.gambiae_sl	Sudanian	Orodara	chlorfenapyr	100 ug/bottle	1	Susceptibility	5	66	76.74	86	0	100.0	86	0	100.0	86	0	100.0	86
4	43756	An.gambiae_sl	Sudanian	Soumousso	chlorfenapyr	100 ug/bottle	1	Susceptibility	5	24	19.83	121	0	100.0	121	0	100.0	121	0	100.0	121
5	43711	An.gambiae_sl	Sudanian	Mangodara	chlorfenapyr	100 ug/bottle	1	Susceptibility	5	58	50.43	115	0	100.0	115	0	100.0	115	0	100.0	115
6	43744	An.gambiae_sl	Sudanian	Karangasso-Vigué	chlorfenapyr	100 ug/bottle	1	Susceptibility	5	23	20.00	110.871	4.1285	96.41	111.978	3.02244	97.37	115	0	100.0	115
7	43732	An.gambiae_sl	Sudan-sahelian	Solenzo	chlorfenapyr	100 ug/bottle	1	Susceptibility	5	7	6.36	105.116	4.884	95.56	109.083	0.916667	99.17	110	0	100.0	110
8	43756	An.gambiae_sl	Sudan-sahelian	Nouna	chlorfenapyr	100 ug/bottle	1	Susceptibility	5	39	33.62	116	0	100.0	116	0	100.0	116	0	100.0	116
9	43757	An.gambiae_sl	Sudan-sahelian	Boromo	chlorfenapyr	100 ug/bottle	1	Susceptibility	5	9	7.087	98.3488	28.6512	77.44	122.933	4.0669	96.79	125.976	1.02419	99.19	127
10	43769	An.gambiae_sl	Sudan-sahelian	Ouagadougou	chlorfenapyr	100 ug/bottle	1	Susceptibility	5	56	65.12	86	0	100.0	86	0	100.0	86	0	100.0	86
11	43721	An.gambiae_sl	Sahelian	Kongoussi	chlorfenapyr	100 ug/bottle	1	Susceptibility	5	4	4.00	100	0	100.0	100	0	100.1	100	0	100.0	100
12	43742	An.gambiae_sl	Sahelian	Seguenega	chlorfenapyr	100 ug/bottle	1	Susceptibility	5	46	46.46	99	0	100.0	99	0	100.2	99	0	100.0	99
13	43761	An.gambiae_sl	Sahelian	Kaya	chlorfenapyr	100 ug/bottle	1	Susceptibility	5	26	21.14	121.979	1.0209	99.17	121.975	1.025	99.17	123	0	100.0	123
13	43729	An.gambiae_Kisumu		Insectary strains	chlorfenapyr	100 ug/bottle	1	Susceptibility	5	50	100.0	50	0	100.0	50	0	100.0	50	0	100.0	50
13	43713	An.gambiae_Kisumu		Insectary strains	chlorfenapyr	100 ug/bottle	1	Susceptibility	5	49	100.0	49	0	100.0	49	0	100.0	49	0	100.0	49
13	43742	An.gambiae_Kisumu		Insectary strains	chlorfenapyr	100 ug/bottle	1	Susceptibility	5	50	100.0	50	0	100.0	50	0	100.0	50	0	100.0	50
13	43756	An.gambiae_Kisumu		Insectary strains	chlorfenapyr	100 ug/bottle	1	Susceptibility	5	48	100.0	48	0	100.0	48	0	100.0	48	0	100.0	48
13	43711	An.gambiae_Kisumu		Insectary strains	chlorfenapyr	100 ug/bottle	1	Susceptibility	5	47	100.0	47	0	100.0	47	0	100.0	47	0	100.0	47
13	43744	An.gambiae_Kisumu		Insectary strains	chlorfenapyr	100 ug/bottle	1	Susceptibility	5	50	100.0	50	0	100.0	50	0	100.0	50	0	100.0	50
13	43732	An.gambiae_Kisumu		Insectary strains	chlorfenapyr	100 ug/bottle	1	Susceptibility	5	50	100.0	50	0	100.0	50	0	100.0	50	0	100.0	50
13	43756	An.gambiae_Kisumu		Insectary strains	chlorfenapyr	100 ug/bottle	1	Susceptibility	5	48	100.0	48	0	100.0	48	0	100.0	48	0	100.0	48
13	43757	An.gambiae_Kisumu		Insectary strains	chlorfenapyr	100 ug/bottle	1	Susceptibility	5	49	100.0	49	0	100.0	49	0	100.0	49	0	100.0	49
13	43769	An.gambiae_Kisumu		Insectary strains	chlorfenapyr	100 ug/bottle	1	Susceptibility	5	50	100.0	50	0	100.0	50	0	100.0	50	0	100.0	50
13	43721	An.gambiae_Kisumu		Insectary strains	chlorfenapyr	100 ug/bottle	1	Susceptibility	5	46	100.0	46	0	100.0	46	0	100.0	46	0	100.0	46
13	43742	An.gambiae_Kisumu		Insectary strains	chlorfenapyr	100 ug/bottle	1	Susceptibility	5	50	100.0	50	0	100.0	50	0	100.0	50	0	100.0	50
13	43761	An.gambiae_Kisumu		Insectary strains	chlorfenapyr	100 ug/bottle	1	Susceptibility	5	50	100.0	50	0	100.0	50	0	100.0	50	0	100.0	50
13	43742	An.gambiae_Kisumu		Insectary strains	chlorfenapyr	100 ug/bottle	1	Susceptibility	5	50	100.0	50	0	100.0	50	0	100.0	50	0	100.0	50
